# Supplementary material for: Influence of Pomace Matrix and Cyclodextrin Encapsulation on Olive Pomace Polyphenols’ Bioaccessibility and Intestinal Permeability
Source: MDPI journal article supplement (doi:10.3390/nu12030669), 2020-02-29
Supplement: s1 [file s1]

**Table S1.** Determination of the HTS olive pomace polyphenols' transport mechanism.

| Transport | <b>P<sub>app</sub> (cm s<sup>-1</sup>)</b> |                   |                 |
|-----------|--------------------------------------------|-------------------|-----------------|
|           | <b>HTS</b>                                 | <b>TS</b>         | <b>OLE</b>      |
| a-b_mix   | 8.1E-06 ± 4.8E-07                          | 3.2E-06 ± 2.4E-06 | 1.1-07 ± 1.1-08 |
| a-b       | 7.6E-06 ± 6.3E-07                          | 3.2E-06 ± 3.5E-06 | 0               |
| b-a       | 1.2E-05 ± 8.6E-07                          | 3.0E-06 ± 8.9E-07 | 0               |
| Ratio     |                                            |                   |                 |
| Efflux    | 1.47 ± 0.07                                | 0.93 ± 0.00       | N/A             |
| Uptake    | 0.67 ± 0.03                                | 1.08 ± 0.00       | N/A             |

Papp (apparent permeability coefficient) was determined for HTS (hydroxytyrosol), TS (tyrosol), and OLE (oleuropein) transport from apical (a) to basolateral (b) chamber either in their mix (a-b\_mix) or as one-compound (a-b), and when transported from basolateral to apical chamber (b-a). The efflux ratio is defined as the quotient of the secretory permeability and the absorptive permeability (Papp<sub>b-a</sub>/Papp<sub>a-b</sub>). Uptake ratio is defined as the inverse of the efflux ratio (Papp<sub>a-b</sub>/Papp<sub>b-a</sub>). Data are presented as mean ± standard deviation. All the experiments were done in triplicates.
